# Supplementary material
Source: HighWire-hosted journal article supplement (https://www.cmajopen.ca/highwire/filestream/88249/field_highwire_adjunct_files/1/open-2021-0192-2-at.pdf)
Supplement: open-2021-0192-2-at.pdf [file open-2021-0192-2-at.pdf]

# 1 Supplementary Material

2

| Supplemental Table 1. Effect of legislation on firearm homicides in Canada |      |                             |                                                                                                                                                                                                                                                                                                                                                                              |                                                                                                                                                                                                      |
|----------------------------------------------------------------------------|------|-----------------------------|------------------------------------------------------------------------------------------------------------------------------------------------------------------------------------------------------------------------------------------------------------------------------------------------------------------------------------------------------------------------------|------------------------------------------------------------------------------------------------------------------------------------------------------------------------------------------------------|
| Study (Year)                                                               | Bill | Reported beneficial effect? | Effect on firearm homicides <sup>1</sup>                                                                                                                                                                                                                                                                                                                                     | Evidence of method substitution                                                                                                                                                                      |
| Sproule (1988)                                                             | C-51 | Yes                         | <ul style="list-style-type: none"> <li>• No change in total standardized national homicide rate</li> <li>• Mean standardized firearm homicide rate decreased from 1.38 to 1.10 per 100,000</li> </ul>                                                                                                                                                                        | Non-firearm homicide increased post-Bill C-51. After accounting for relationship between suspect/victim, effect was diminished due to high victim:suspect ratio in firearm vs. non-firearm homicides |
| Mundt (1990)                                                               | C-51 | No                          | <ul style="list-style-type: none"> <li>• No effect on homicide rate</li> </ul>                                                                                                                                                                                                                                                                                               | None reported                                                                                                                                                                                        |
| Mauser (1992)                                                              | C-51 | No                          | <ul style="list-style-type: none"> <li>• No significant effect on homicide rate</li> <li>• Covariates: male youth % of population, unemployment rate, % of population foreign immigrant, gun law (before/after 1977), homicide clearance rate, % of population with Indian status, time (to account for linear trend in homicide rates)</li> </ul>                           | None reported                                                                                                                                                                                        |
| Leenaars (1994, 1996, 1997, 2001)                                          | C-51 | Yes                         | <ul style="list-style-type: none"> <li>• Mean firearm homicide rate (per 100,000 per year) decreased from <math>0.96 \pm 0.15</math> to <math>0.82 \pm 0.08</math></li> <li>• Use of firearms for homicide was decreased for those &gt;15 years</li> </ul>                                                                                                                   | Non-firearm methods for homicides increased in 15-24 year olds                                                                                                                                       |
|                                                                            |      |                             | Multivariate model <ul style="list-style-type: none"> <li>• Decline in overall homicide rate</li> <li>• Nonsignificant decline in firearms homicide rate</li> <li>• Nonsignificant reduction in % of homicides committed by firearms</li> <li>• Covariates: Bill C-51, % young males, birth rate, marriage rate, divorce rate, unemployment, median family income</li> </ul> | No increase in homicide rate by all other methods                                                                                                                                                    |
| Bridges (2004)                                                             | C-17 | Yes                         | <ul style="list-style-type: none"> <li>• Mean firearm homicide rate decreased from 0.69 per 100,000 (SE 0.03) to 0.57 per 100,000 (SE 0.04)</li> <li>• Rates of firearm homicide, total homicide rate, and homicide by all other methods showed significant decreases</li> </ul>                                                                                             | Raw rate of homicide by all other methods decreased                                                                                                                                                  |
| Blais (2011)                                                               | C-51 | Yes                         | <ul style="list-style-type: none"> <li>• Firearm homicide rate decreased by 5%-10%, depending on the province</li> <li>• Reduction most noticeable in homicides committed with a shotgun or a hunting rifle</li> </ul>                                                                                                                                                       | No evidence of method substitution                                                                                                                                                                   |
|                                                                            | C-17 | No                          | <ul style="list-style-type: none"> <li>• No decline in firearm homicide rate</li> </ul>                                                                                                                                                                                                                                                                                      | No evidence of method substitution                                                                                                                                                                   |
|                                                                            | C-68 | Yes                         | <ul style="list-style-type: none"> <li>• Firearm homicide rate decreased by 5%-10%, depending on the province</li> </ul>                                                                                                                                                                                                                                                     | No evidence of method substitution                                                                                                                                                                   |

|                                                                                                                                                                                          |      |     |                                                                                                                                                                                                                                                                                                                                                                                                                                                                                                                                                                                                    |                                     |
|------------------------------------------------------------------------------------------------------------------------------------------------------------------------------------------|------|-----|----------------------------------------------------------------------------------------------------------------------------------------------------------------------------------------------------------------------------------------------------------------------------------------------------------------------------------------------------------------------------------------------------------------------------------------------------------------------------------------------------------------------------------------------------------------------------------------------------|-------------------------------------|
|                                                                                                                                                                                          |      |     | <ul style="list-style-type: none"> <li>• Reduction most noticeable in homicides committed with a shotgun or a hunting rifle</li> </ul> <p>Covariates: Bill C-51, Bill C-17, Bill C-68, % population aged 15-24 yrs, population growth associated with immigration</p> <ul style="list-style-type: none"> <li>• Effectiveness of laws was attributed to reduced access and availability of firearms rather than to the severity of sentences provided in the legislation</li> </ul>                                                                                                                 |                                     |
| Langmann (2012)                                                                                                                                                                          | C-51 | No  | <ul style="list-style-type: none"> <li>• No effect on firearm homicide rate</li> <li>• No effect on overall homicide rate or spousal homicide rate</li> </ul>                                                                                                                                                                                                                                                                                                                                                                                                                                      | No evidence of method substitution  |
|                                                                                                                                                                                          | C-17 | No  | <ul style="list-style-type: none"> <li>• No effect on firearm homicide rate</li> <li>• No effect on overall homicide rate or spousal homicide rate</li> </ul>                                                                                                                                                                                                                                                                                                                                                                                                                                      | No evidence of method substitution  |
|                                                                                                                                                                                          | C-68 | No  | <ul style="list-style-type: none"> <li>• No effect on firearm homicide rate</li> <li>• No effect on overall homicide rate or spousal homicide rate</li> <li>• Joinpoint analysis showed an increasing trend in homicide by firearm rate after enactment of the licensing portion of C-68</li> </ul> <p>Covariates: median age of population, population attributed to immigration, population per police officers, rate of prison incarceration, rate of unemployment, % of 15-24 yr old population in low income bracket, % of total population in low income bracket, Gini index of equality</p> | No evidence of method substitution  |
| Linteau (2013)                                                                                                                                                                           | C-68 | Yes | <ul style="list-style-type: none"> <li>• Gradual decline in firearms homicide rate was observed in homicides committed with long guns (rifle, shotgun)</li> </ul>                                                                                                                                                                                                                                                                                                                                                                                                                                  | No substitution effect was observed |
| McPhedran (2013)                                                                                                                                                                         | C-68 | No  | <ul style="list-style-type: none"> <li>• ARIMA modelling showed no effect on domestic firearm homicide</li> <li>• ZA test for males showed no significant breaks in firearm homicide time series</li> <li>• ZA test for females showed significant breaks in firearm homicide time series but these breakpoint occurred prior to Bill C-68</li> </ul>                                                                                                                                                                                                                                              | None reported                       |
| Langmann (2020)                                                                                                                                                                          | C-17 | No  | <ul style="list-style-type: none"> <li>• No effect on male or female homicide rates</li> </ul>                                                                                                                                                                                                                                                                                                                                                                                                                                                                                                     | None reported                       |
|                                                                                                                                                                                          | C-68 | No  | <ul style="list-style-type: none"> <li>• No effect on male or female homicide rates</li> </ul> <p>Covariates: province/territory, year, % license holders, alcohol consumption, unemployment rates, % aboriginal population, % low income persons</p>                                                                                                                                                                                                                                                                                                                                              | None reported                       |
| <p>SE, standard error; ARIMA, autoregressive integrated moving average; ZA, Zivot-Andrews.<br/> <sup>1</sup>Significance of results are reported verbatim from the original article.</p> |      |     |                                                                                                                                                                                                                                                                                                                                                                                                                                                                                                                                                                                                    |                                     |
